# Supplementary material
Source: HighWire-hosted journal article supplement (https://bmjopenquality.bmj.com/content/5/1/u210706.w4335)
Supplement: inline-supplementary-material-2 [file inline-supplementary-material-2.pdf]

Name:  
Hospital Number:  
Ward:

**Severe Sepsis**  
Start the clock: Date / /  
\_\_\_\_:\_\_\_\_h

|                                                                                                                                                                                                                                                | Time | Initial | Reason not done |
|------------------------------------------------------------------------------------------------------------------------------------------------------------------------------------------------------------------------------------------------|------|---------|-----------------|
| <b>A. Inform Nurse in Charge</b>                                                                                                                                                                                                               |      |         |                 |
| <b>B. Discuss with Senior Dr or Consultant- use SBAR</b>                                                                                                                                                                                       |      |         |                 |
| <b>1. Oxygen:</b> High flow 15L/min via non rebreathe mask<br>Target saturations > 94% (unless otherwise stated in medical notes)                                                                                                              |      |         |                 |
| <b>2. Blood cultures:</b> Take at least one set plus all relevant blood tests, (Consider also sputum, urine, CSF, pus samples)                                                                                                                 |      |         |                 |
| <b>3. IV antibiotics:</b> As per Trust Guidelines<br>Prescribe first dose as Stat dose                                                                                                                                                         |      |         |                 |
| <b>4. Fluid resuscitate:</b> If hypotensive give 250 mls sodium chloride 0.9% / colloid given over 10 minutes, assess response. Further fluid boluses up to 40 ml/kg.<br><small>NB. PGD trained nurses can give up to 500 mls in total</small> |      |         |                 |
| <b>5. Serum arterial lactate and Hb:</b> (ABG analyser: ED, ITU)<br>Ensure Hb > 70g/l. Cross match if Hb < 70 g/l                                                                                                                              |      |         |                 |
| <b>6. Catheterise and commence fluid balance:</b><br>If fully mobile allow to self void but record balance                                                                                                                                     |      |         |                 |
| <b>PLUS C. If organ dysfunction persists despite above interventions or lactate &gt;4, discuss with Critical Care holder Bleep 4716</b>                                                                                                        |      |         |                 |

One hour time check: all steps done? Yes ☐ No ☐

Name: \_\_\_\_\_ (print) \_\_\_\_\_ (sign)

Designation:

Bleep/Ext no:
